# Supplementary material for: The Inhibition of NLRP3 Inflammasome and IL-6 Production by Hibiscus noldeae Baker f. Derived Constituents Provides a Link to Its Anti-Inflammatory Therapeutic Potentials
Source: PubMed Central journal article supplement (PMC7587372; doi:10.3390/molecules25204693), 2020-10-14
Supplement: molecules-25-04693-s001.pdf [file molecules-25-04693-s001.pdf]

## Supplementary material

### **The inhibition of NLRP3 inflammasome and IL-6 by *Hibiscus noldeae Baker f.* derived constituents provides a link to its anti-inflammatory therapeutic potentials**

Jean Claude Didelot Tomani<sup>1,2</sup>, Vedaste Kagisha<sup>1,3</sup>, Alembert Tchinda<sup>4</sup>, Olivia Jansen, Allison Ledoux<sup>3</sup>, Luc Vanhamme<sup>2</sup>, Michel Frederich<sup>3,§</sup>, Raymond Muganga<sup>1,§</sup>, Jacob Souopgui<sup>2,§,\*</sup>

<sup>1</sup>University of Rwanda, College of Medicine and Health Sciences, School of Medicine and Pharmacy, Kigali, Rwanda

<sup>2</sup>Université Libre de Bruxelles, Institute for Molecular Biology and Medicine, Department of Molecular Biology, Gosselies, Belgium.

<sup>3</sup>University of Liège, Centre for Interdisciplinary Research on Medicines (CIRM), Laboratory of Pharmacognosy, Liège, Belgium

<sup>4</sup>Laboratory of Phytochemistry, Centre for Research on Medicinal Plants and Traditional Medicine, Institute of Medical Research and Medicinal Plants Studies, Yaounde, Cameroon.

<sup>§</sup>*Equal contribution*

\*Correspondence to: Laboratory of Embryology & Biotechnology, DBM-IBMM/ULB, Rue des Professeurs Jeener et Brachet, 12, 6041 Gosselies, Belgium. *E-mail address*: jsouopgu@ulb.ac.be (J. Souopgui).

**Table S.1:** The  $^1\text{H}$  NMR chemical shifts for the 3 purified compounds from *H. noldeae* ( $\text{DMSO-}d_6$ , 500 MHz).

| 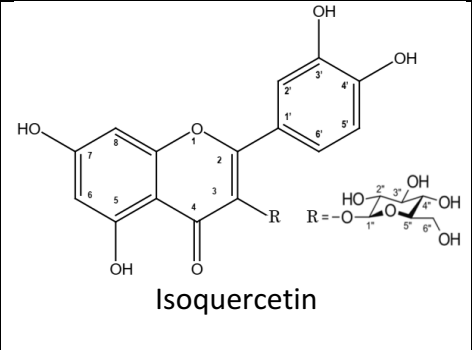 <p>Isoquercetin</p> |         |  <p>Caffeic acid</p> |         |  <p>Caffeoyl-hydrocitric acid</p> |             |
|-------------------------------------------------------------------------------------------------------|---------|--------------------------------------------------------------------------------------------------------|---------|----------------------------------------------------------------------------------------------------------------------|-------------|
| Chemical shifts (ppm)                                                                                 | Protons | $\delta_{\text{H}}$ (ppm), Chemical shifts (ppm)                                                       | Protons | Chemical shifts (ppm)                                                                                                | Protons     |
| 12.64 (1H, s)                                                                                         | OH-5    | 12.15 (1H, s)                                                                                          | H-8     | 13.3-12.35 (3H, s)                                                                                                   | H-9, 11, 13 |
| 10.86 (1H, s)                                                                                         | OH-7    | 9.52 (1H, s)                                                                                           | H-3     | 9.64 (1H, s)                                                                                                         | OH-2        |
| 9.72 (1H, s)                                                                                          | OH-3'   | 9.12 (1H, s)                                                                                           | H-2     | 9.18 (1H, s)                                                                                                         | OH-3        |
| 9.15 (1H, s)                                                                                          | OH-4'   | 7.41 (1H, d)                                                                                           | H-6     | 7.57 (1H, d)                                                                                                         | H-6         |
| 7.67 (1H, dd)                                                                                         | H-2'    | 7.02 (1H, d)                                                                                           | H-1     | 7.07 (1H, d)                                                                                                         | H-1         |
| 7.52 (1H, d)                                                                                          | H-6'    | 6.96 (1H, dd)                                                                                          | H-5     | 7.03 (1H, dd)                                                                                                        | H-5         |
| 6.81 (1H, d)                                                                                          | H-5'    | 6.75 (1H, d)                                                                                           | H-4     | 6.78 (1H, d)                                                                                                         | H-4         |
| 6.40 (1H, d)                                                                                          | H-8     | 6.16 (1H, d)                                                                                           | H-7     | 6.31 (1H, d)                                                                                                         | H-7         |
| 6.20 (1H, d)                                                                                          | H-6     |                                                                                                        |         | 5.24 (1H, s)                                                                                                         | H-8         |
| 5.38 (1H, d)                                                                                          | H-1''   |                                                                                                        |         | 3.17 (2H, s)                                                                                                         | H-12        |
| 5.12 (1H, s)                                                                                          | OH-3''  |                                                                                                        |         |                                                                                                                      |             |
| 4.84 (1H, s)                                                                                          | OH-4''  |                                                                                                        |         |                                                                                                                      |             |
| 4.42 (2H, s)                                                                                          | OH-6''  |                                                                                                        |         |                                                                                                                      |             |
| 3.65 (1H, s)                                                                                          | H-6''a  |                                                                                                        |         |                                                                                                                      |             |
| 3.57 (1H, m)                                                                                          | H-6''b  |                                                                                                        |         |                                                                                                                      |             |

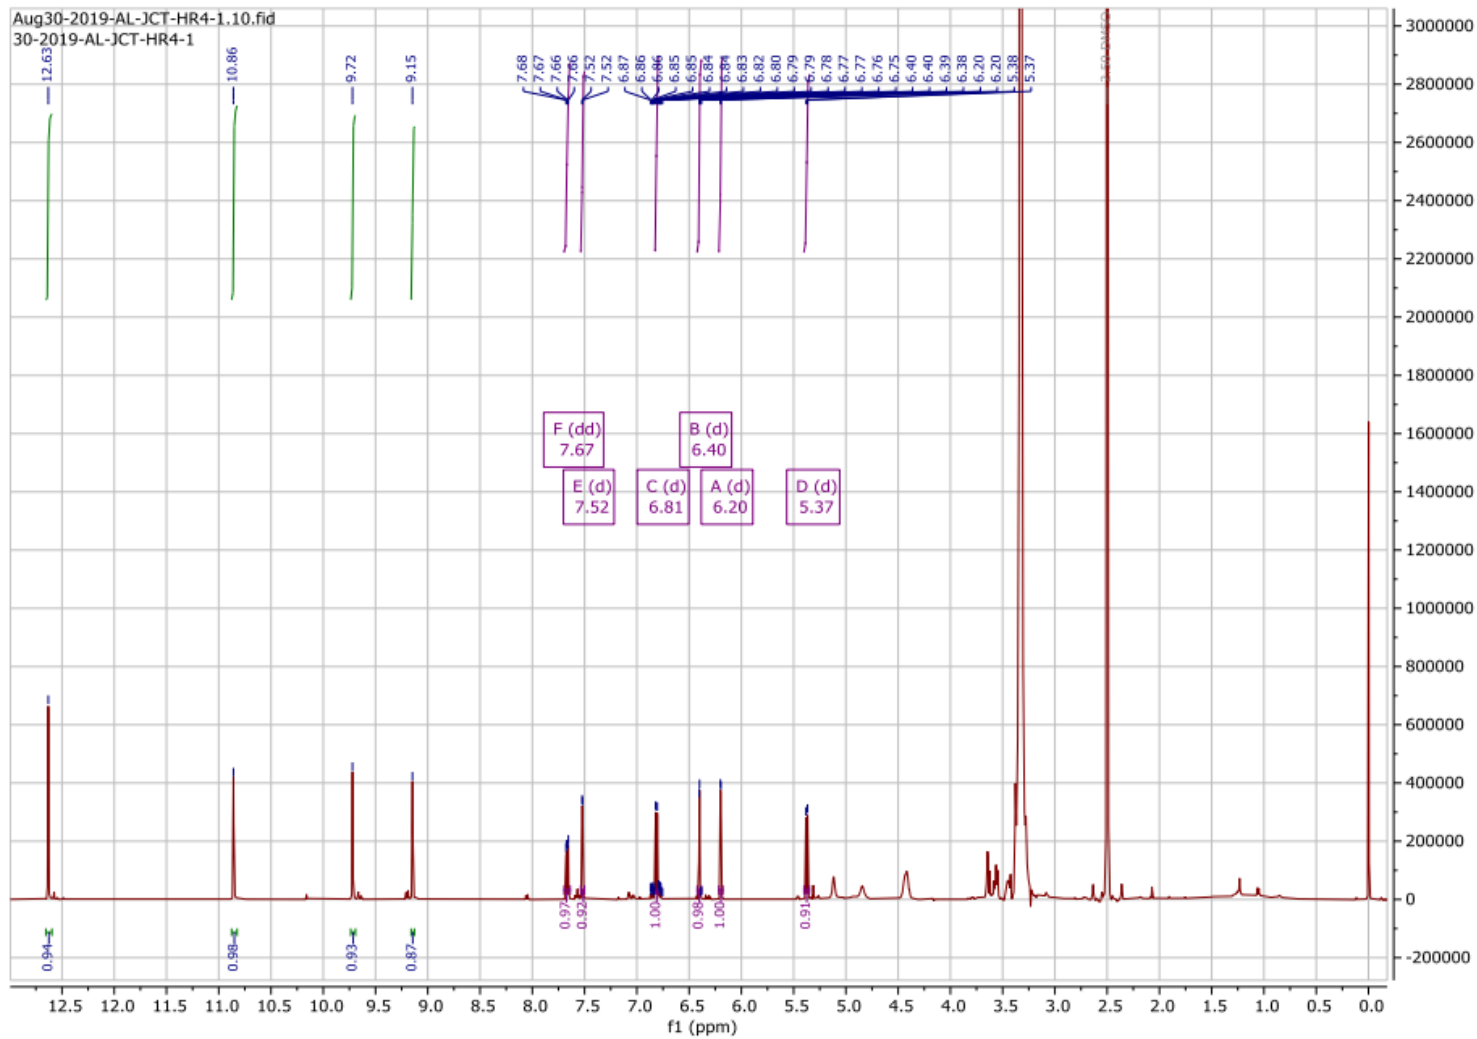

Figure S.1:  $^1\text{H}$ -NMR spectrum of Quercetin-3-O-glucoside (Isoquercetin) ( $\text{DMSO-d}_6$ , 500 MHz)

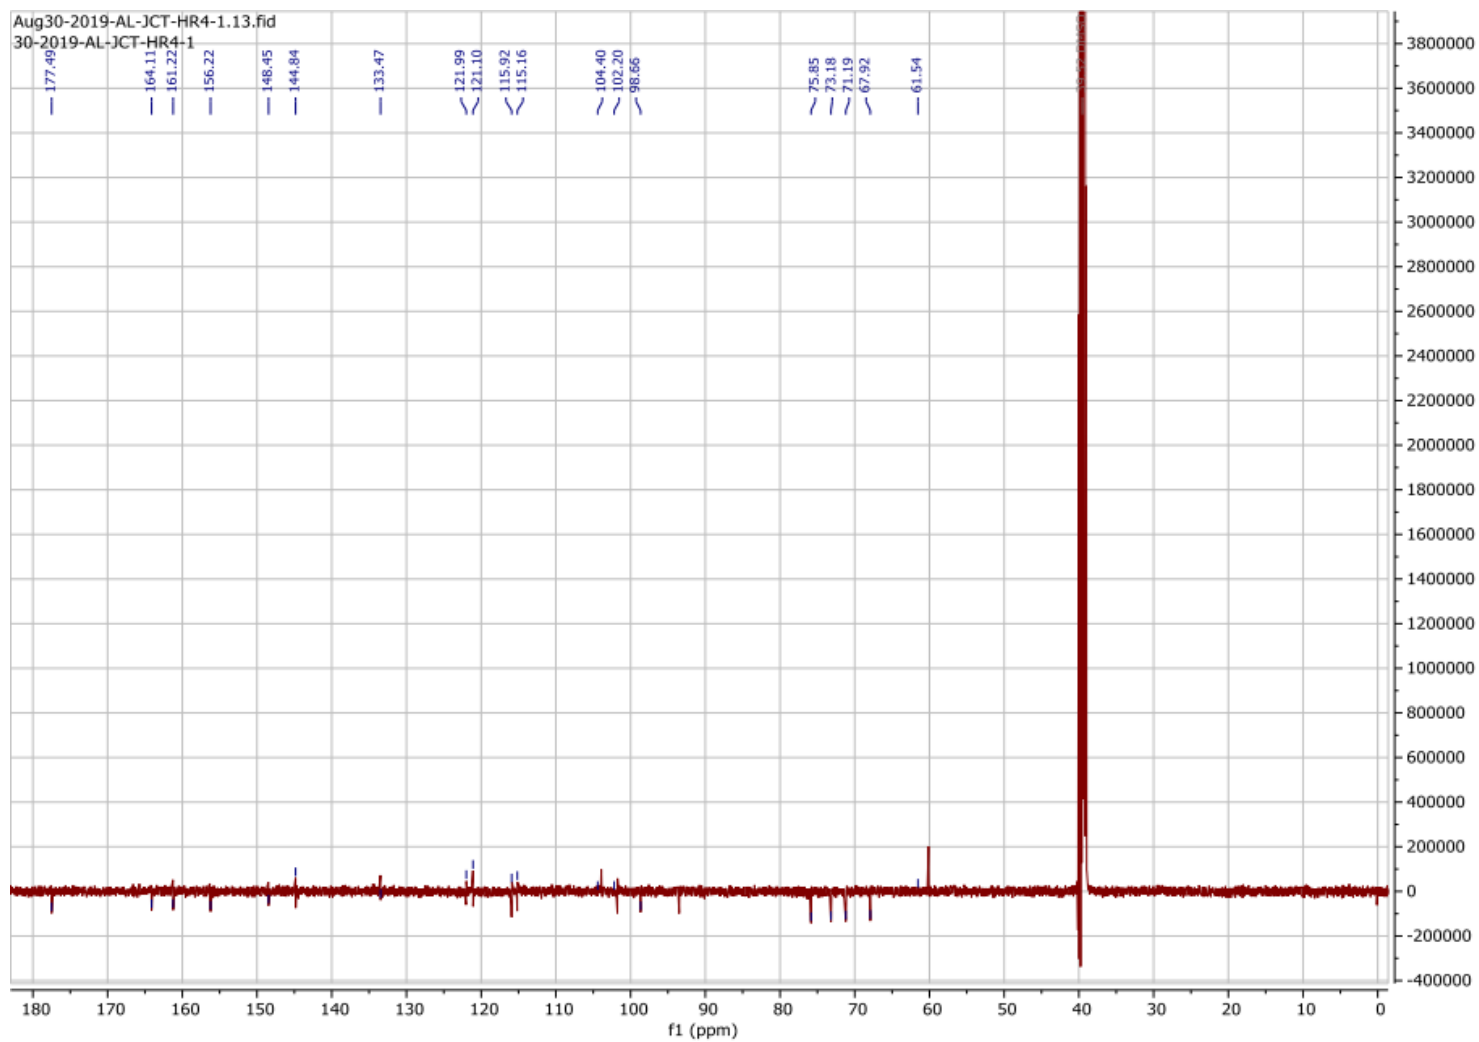

Figure S.2:  $^{13}\text{C}$  spectrum of Quercetin-3-O-glucoside (Isoquercetin) ( $\text{DMSO-d}_6$ , 500 MHz)

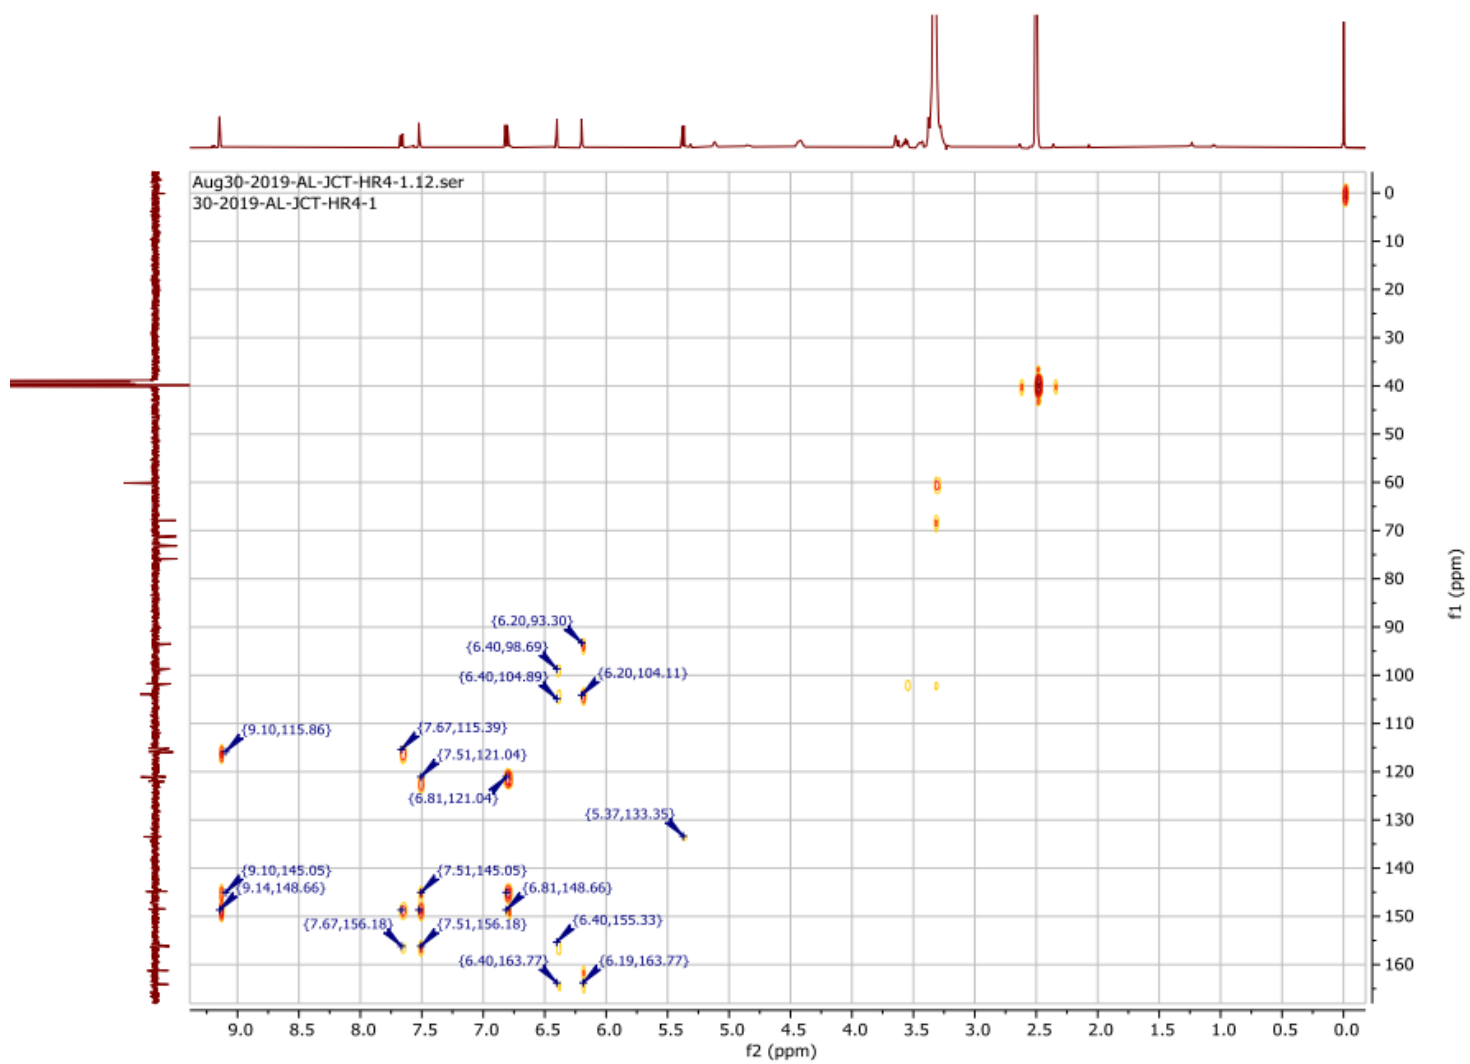

Figure S.3: <sup>1</sup>H, <sup>13</sup>C HMB of Quercetin-3-O-Glucoside (Isoquercetin) (DMSO-d<sub>6</sub>, 500 MHz)

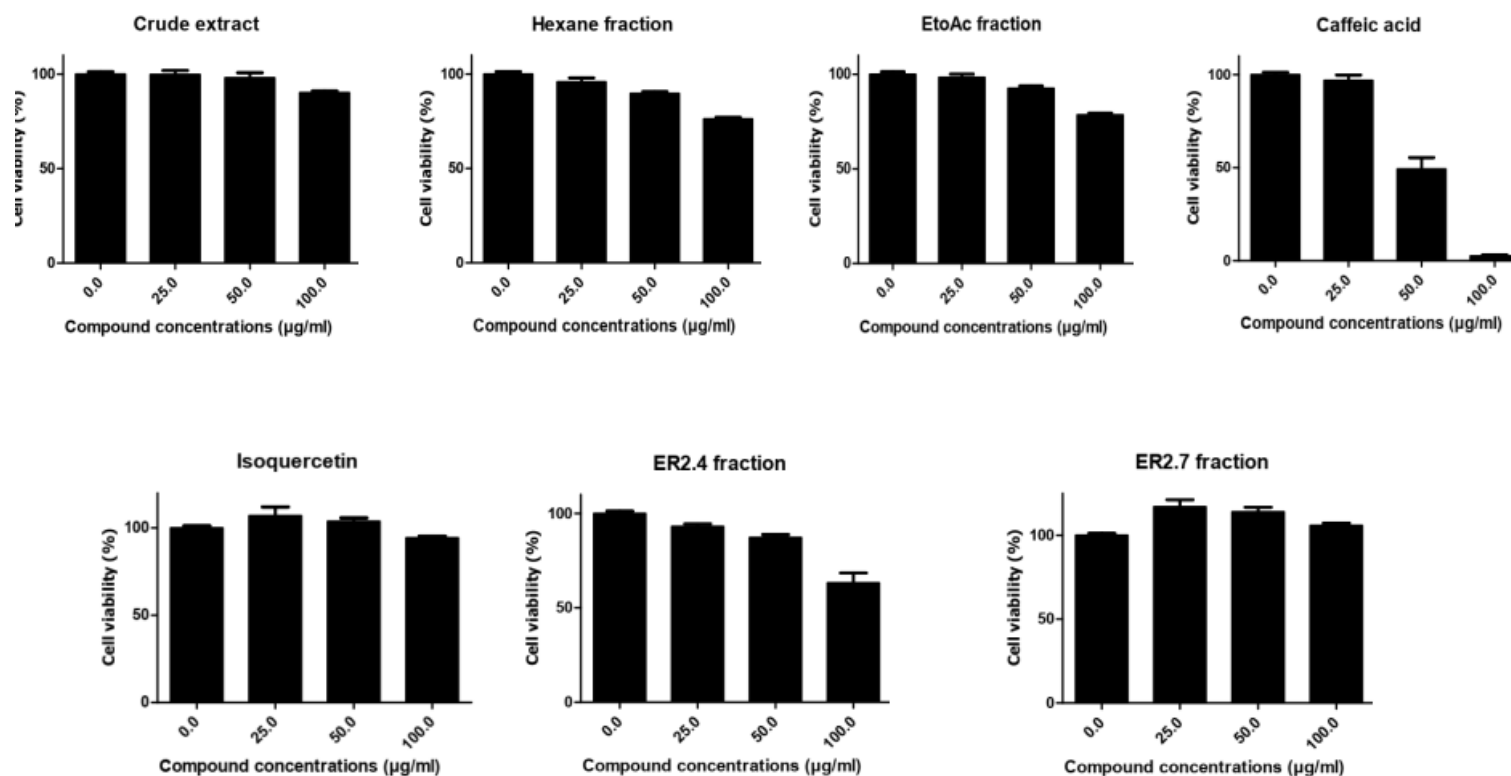

**Figure S.4: Effect of different *H. noldeae*'s constituents on the THP-1 cell viability.** Human leukemia THP-1 monocytes were cultured in RPMI 1640 supplemented with 10% heat-inactivated Fetal Bovine Serum (FBS), 1% glutamine and 1% of penicillin-streptomycin and maintained at 37 °C under 5% CO<sub>2</sub> in a humidified atmosphere. Cells were passaged at least 5 times before any experiment. Cells were then incubated with different compounds at given concentrations for 24 h at 37°C, 5%CO<sub>2</sub> in a humidified atmosphere. The cell viability was then evaluated by celltiter glo luminescent cell viability assay (Promega) according to the manufacturer instructions. Viability (%) = [RLU (treated cells)/ RLU (control cells)] x 100.

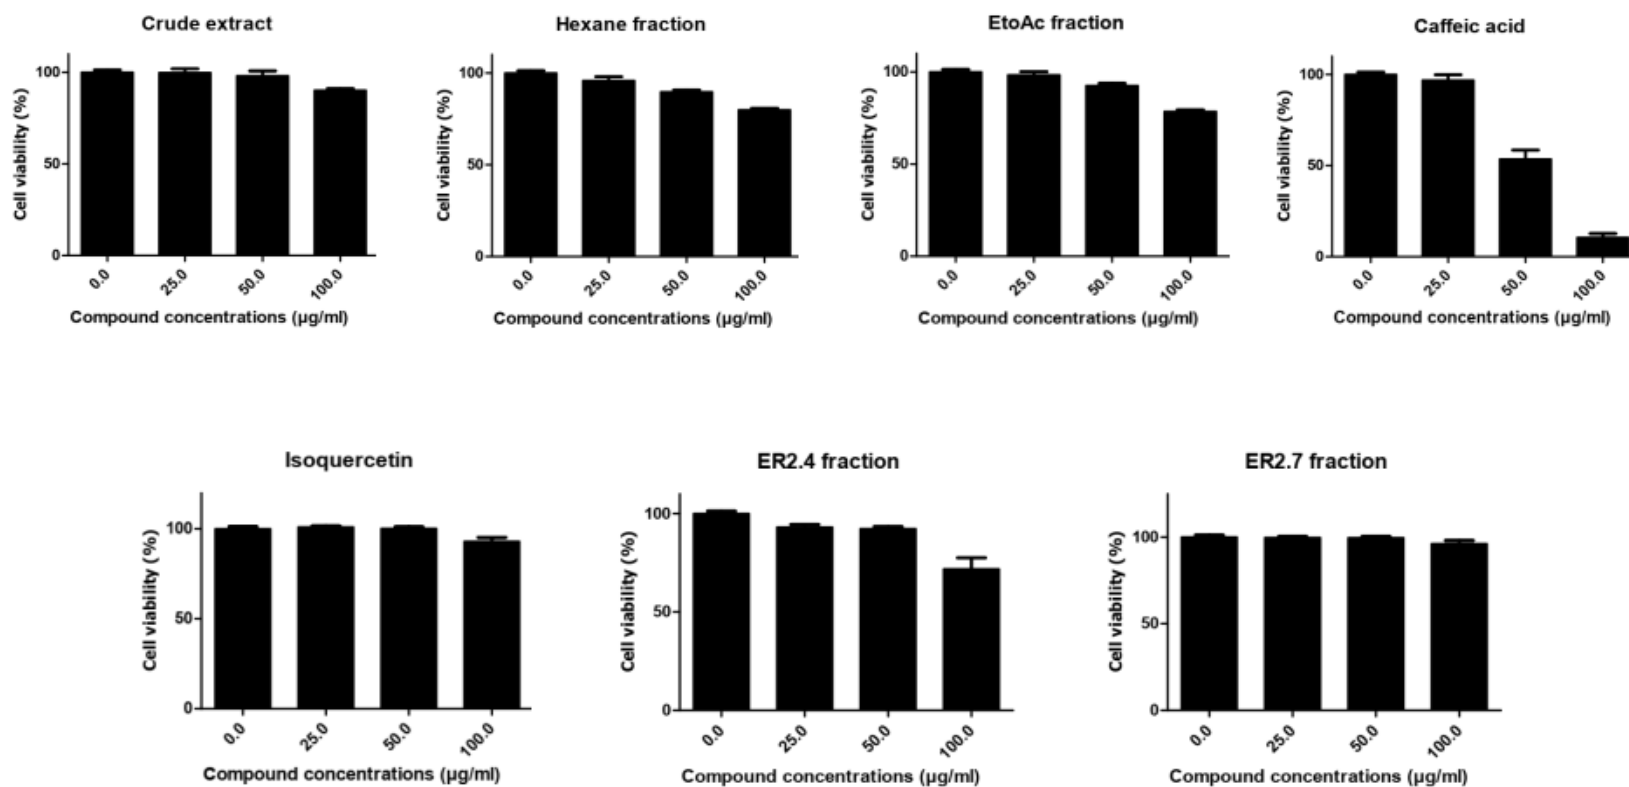

**Figure S.5: Effect of different *H. noldeae*'s constituents on the RAW264.7 cell viability.** RAW264.7 murine cells were cultured in DMEM supplemented with 10% heat-inactivated FBS, 1% glutamine, 1% penicillin-streptomycin and 1% Sodium pyruvate and maintained at 37 °C under 5% CO<sub>2</sub> in a humidified atmosphere. Cells were passaged at least 5 times, and allowed to acclimate for 24h, before any experiment. Cells were then incubated with different compounds at given concentrations for 24 h at 37°C, 5%CO<sub>2</sub> in a humidified atmosphere. The cell viability was then evaluated by celltiter-glo luminescent cell viability assay (Promega) according to the manufacturer instructions. Viability (%) = [RLU (treated cells)/ RLU (control cells)] × 100.

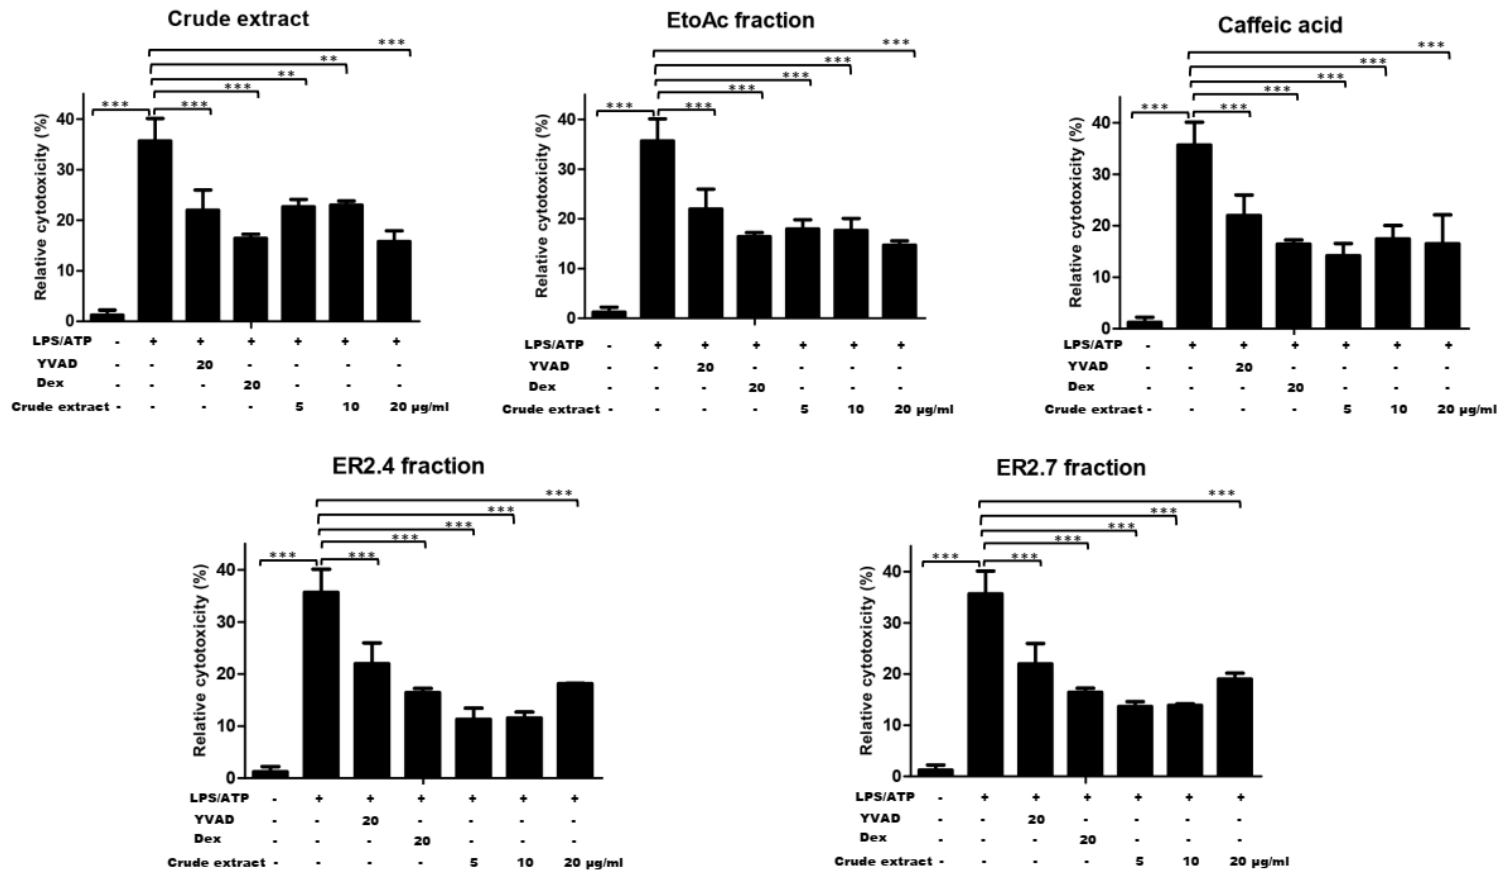

Figure S.6: Crude extract and the ethylacetate fraction as well as the caffeic acid and semi-purified fractions (ER 2.4 and ER 2.7), thereof exhibited significant inhibition of pyroptosis in THP-1 derived macrophages. PMA-differentiated cells were pretreated by corresponding compounds for 1 , and then primed by LPS (1µg/ml) for 3h. Cells were then stimulated by ATP (5mM) for additional 1 h. Samples(5µl) were collected and frozen in LDH Storage Buffer at 1:20 dilution. Samples were thawed, further diluted 5-fold and 50µl of diluted samples were added to 50µl LDH Detection Reagent. Luminescence was recorded after 60 min incubation at room temperature. The % Cytotoxicity = 100 X (Experimental LDH Release – Medium Background)/(Maximum LDH Release Control-Medium Background).
